# Supplementary material for: The Landscape of Gene Expression and Molecular Regulation Following Spinal Cord Hemisection in Rats
Source: Front Mol Neurosci. 2019 Nov 22;12:287. doi: 10.3389/fnmol.2019.00287 (PMC6883948; doi:10.3389/fnmol.2019.00287)
Supplement: Supplementary file 1 [file Table_1.XLS]

## Sheet: Table S1.1
Table S1.1 Summary of the sequencing reads mapped to gene.
Sample	Sample_0h_C_1	Sample_0h_C_2	Sample_0h_C_3	Sample_0h_R_1	Sample_0h_R_2	Sample_0h_R_3	Sample_0h_S_1	Sample_0h_S_2	Sample_0h_S_3	Sample_12h_C_1	Sample_12h_C_2	Sample_12h_C_3	Sample_12h_R_1	Sample_12h_R_2	Sample_12h_R_3	Sample_12h_S_1	Sample_12h_S_2	Sample_12h_S_3	Sample_14d_C_1	Sample_14d_C_2	Sample_14d_C_3	Sample_14d_R_1	Sample_14d_R_2	Sample_14d_R_3	Sample_14d_S_1	Sample_14d_S_2	Sample_14d_S_3	Sample_1d_C_1	Sample_1d_C_2	Sample_1d_C_3	Sample_1d_R_1	Sample_1d_R_2	Sample_1d_R_3	Sample_1d_S_1	Sample_1d_S_2	Sample_1d_S_3	Sample_21d_C_1	Sample_21d_C_2	Sample_21d_C_3	Sample_21d_R_1	Sample_21d_R_2	Sample_21d_R_3	Sample_21d_S_1	Sample_21d_S_2	Sample_21d_S_3	Sample_28d_C_1	Sample_28d_C_2	Sample_28d_C_3	Sample_28d_R_1
Total reads	111563964	108791114	108132496	108276190	112262278	108228930	110691238	111275972	106924680	109055160	111399930	111154718	110230312	109575832	107743720	112056814	109454858	107666504	110329066	109575184	108467328	111022522	110950920	110102708	112424282	109734084	111969064	109423940	108232846	110806530	109635764	109346270	110590366	110570474	108146938	108759532	112055276	109575626	109621242	109002976	108929406	108941494	111039380	108152736	109218446	109880616	108937376	111209322	110708644
Total mapped reads	73411483(65.80%)	73779651(67.81%)	72806755(67.33%)	71897088(66.40%)	74848728(66.67%)	70376909(65.02%)	74008839(66.86%)	76965907(69.16%)	74275781(69.46%)	71757772(65.79%)	74286177(66.68%)	79467988(71.49%)	69944710(63.45%)	75854870(69.22%)	77889979(72.29%)	76739820(68.48%)	78446287(71.66%)	73810655(68.55%)	71396384(64.71%)	71339851(65.10%)	72712017(67.03%)	68474938(61.67%)	71155391(64.13%)	68787516(62.47%)	76320568(67.88%)	72740983(66.28%)	77863340(69.54%)	74002542(67.62%)	77808406(71.88%)	74470507(67.20%)	71696492(65.39%)	76773772(70.21%)	77433763(70.01%)	74888175(67.72%)	75578497(69.88%)	74362168(68.37%)	68216099(60.87%)	74640722(68.11%)	78312529(71.43%)	67435406(61.86%)	72212819(66.29%)	75123444(68.95%)	63280318(56.98%)	74694680(69.06%)	79492436(72.78%)	73970586(67.31%)	69292575(63.60%)	75507629(67.89%)	66833259(60.36%)
Multiple mapped	25531334(22.88%)	25318196(23.27%)	25245523(23.34%)	25236425(23.30%)	25394263(22.62%)	23625544(21.82%)	25673785(23.19%)	26228297(23.57%)	25704609(24.03%)	25142719(23.05%)	25467454(22.86%)	26765541(24.07%)	24468047(22.19%)	26253925(23.95%)	26009512(24.14%)	26500734(23.64%)	26445690(24.16%)	24389765(22.65%)	24699735(22.38%)	24204197(22.08%)	24750136(22.81%)	24118593(21.72%)	24362520(21.95%)	23840844(21.65%)	26260388(23.35%)	24416346(22.25%)	26140260(23.34%)	26164438(23.91%)	27512104(25.41%)	25695341(23.18%)	25285686(23.06%)	26142436(23.90%)	26444523(23.91%)	25701036(23.24%)	25009150(23.12%)	25064692(23.04%)	23981337(21.40%)	24885777(22.71%)	25650324(23.39%)	23518275(21.57%)	24541839(22.53%)	25095452(23.03%)	22452001(20.21%)	25536545(23.61%)	26153639(23.94%)	25314746(23.03%)	23679052(21.73%)	25548542(22.97%)	23238281(20.99%)
Uniquely mapped	47880149(42.91%)	48461455(44.54%)	47561232(43.98%)	46660663(43.09%)	49454465(44.05%)	46751365(43.19%)	48335054(43.66%)	50737610(45.59%)	48571172(45.42%)	46615053(42.74%)	48818723(43.82%)	52702447(47.41%)	45476663(41.25%)	49600945(45.26%)	51880467(48.15%)	50239086(44.83%)	52000597(47.50%)	49420890(45.90%)	46696649(42.32%)	47135654(43.01%)	47961881(44.21%)	44356345(39.95%)	46792871(42.17%)	44946672(40.82%)	50060180(44.52%)	48324637(44.03%)	51723080(46.19%)	47838104(43.71%)	50296302(46.47%)	48775166(44.01%)	46410806(42.33%)	50631336(46.30%)	50989240(46.10%)	49187139(44.48%)	50569347(46.75%)	49297476(45.32%)	44234762(39.47%)	49754945(45.40%)	52662205(48.04%)	43917131(40.28%)	47670980(43.76%)	50027992(45.92%)	40828317(36.76%)	49158135(45.45%)	53338797(48.83%)	48655840(44.28%)	45613523(41.87%)	49959087(44.92%)	43594978(39.37%)
Reads mapped in proper pairs	69677340(62.45%)	69924120(64.27%)	68220578(63.08%)	68297274(63.07%)	70748166(63.02%)	66047638(61.02%)	70516954(63.70%)	73025820(65.62%)	69440020(64.94%)	67905504(62.26%)	70452160(63.24%)	74818956(67.31%)	65841464(59.73%)	71841354(65.56%)	73702300(68.40%)	72395848(64.60%)	74419380(67.99%)	69778800(64.81%)	67865634(61.51%)	67117238(61.25%)	68522028(63.17%)	64987578(58.53%)	66864004(60.26%)	64308982(58.40%)	72726652(64.68%)	68593516(62.50%)	73102070(65.28%)	69327494(63.35%)	72123854(66.63%)	70052952(63.22%)	67949262(61.97%)	72653750(66.44%)	73252982(66.23%)	70481748(63.74%)	71484996(66.09%)	69869400(64.24%)	64690012(57.73%)	69692062(63.60%)	74268374(67.74%)	63965650(58.68%)	67886740(62.32%)	70714174(64.91%)	59758772(53.81%)	70550334(65.23%)	75214422(68.86%)	69305940(63.07%)	64752488(59.44%)	71072612(63.90%)	63080536(56.97%)
[truncated: 50 more columns]

## Sheet: Table S1.2
Table S1.2 Summary of the sequencing reads mapped to genome.
Sample	Sample_0h_C_1	Sample_0h_C_2	Sample_0h_C_3	Sample_0h_R_1	Sample_0h_R_2	Sample_0h_R_3	Sample_0h_S_1	Sample_0h_S_2	Sample_0h_S_3	Sample_12h_C_1	Sample_12h_C_2	Sample_12h_C_3	Sample_12h_R_1	Sample_12h_R_2	Sample_12h_R_3	Sample_12h_S_1	Sample_12h_S_2	Sample_12h_S_3	Sample_14d_C_1	Sample_14d_C_2	Sample_14d_C_3	Sample_14d_R_1	Sample_14d_R_2	Sample_14d_R_3	Sample_14d_S_1	Sample_14d_S_2	Sample_14d_S_3	Sample_1d_C_1	Sample_1d_C_2	Sample_1d_C_3	Sample_1d_R_1	Sample_1d_R_2	Sample_1d_R_3	Sample_1d_S_1	Sample_1d_S_2	Sample_1d_S_3	Sample_21d_C_1	Sample_21d_C_2	Sample_21d_C_3	Sample_21d_R_1	Sample_21d_R_2	Sample_21d_R_3	Sample_21d_S_2	Sample_21d_S_3	Sample_28d_C_1	Sample_28d_C_2	Sample_28d_C_3	Sample_28d_R_1	Sample_28d_R_2
Total reads	111563964	108791114	108132496	108276190	112262278	108228930	110691238	111275972	106924680	109055160	111399930	111154718	110230312	109575832	107743720	112056814	109454858	107666504	110329066	109575184	108467328	111022522	110950920	110102708	112424282	109734084	111969064	109423940	108232846	110806530	109635764	109346270	110590366	110570474	108146938	108759532	112055276	109575626	109621242	109002976	108929406	108941494	108152736	109218446	109880616	108937376	111209322	110708644	109114086
Total Mapped	103566338(92.83%)	99235429(91.22%)	96416195(89.16%)	100509533(92.83%)	101845554(90.72%)	96223377(88.91%)	102844146(92.91%)	101551164(91.26%)	95119241(88.96%)	101168556(92.77%)	101996128(91.56%)	100853069(90.73%)	101637990(92.21%)	100670420(91.87%)	98076307(91.03%)	104187689(92.98%)	100340557(91.67%)	96649584(89.77%)	100950412(91.50%)	98862966(90.22%)	99003122(91.27%)	101639455(91.55%)	100734234(90.79%)	99975848(90.80%)	103151046(91.75%)	99830777(90.98%)	102485310(91.53%)	100810458(92.13%)	97311853(89.91%)	100219687(90.45%)	101670301(92.73%)	100097039(91.54%)	100258821(90.66%)	102115321(92.35%)	99429896(91.94%)	98280256(90.36%)	102336959(91.33%)	98935910(90.29%)	101723652(92.80%)	99841338(91.60%)	98492336(90.42%)	100361450(92.12%)	97774702(90.40%)	101005654(92.48%)	99131905(90.22%)	97564651(89.56%)	102869190(92.50%)	100760279(91.01%)	98772898(90.52%)
Multiple mapped	13677857(12.26%)	16289476(14.97%)	20667718(19.11%)	12628162(11.66%)	18327803(16.33%)	20678353(19.11%)	13613795(12.30%)	17264505(15.52%)	21385072(20.00%)	13871009(12.72%)	16699118(14.99%)	20398469(18.35%)	14194731(12.88%)	16451234(15.01%)	20611358(19.13%)	14308604(12.77%)	17543790(16.03%)	19297182(17.92%)	14958223(13.56%)	18390704(16.78%)	21249262(19.59%)	14459867(13.02%)	18285430(16.48%)	20369491(18.50%)	14862418(13.22%)	18113080(16.51%)	22158311(19.79%)	14503978(13.25%)	18077183(16.70%)	19022593(17.17%)	13812322(12.60%)	18798951(17.19%)	20719451(18.74%)	15080706(13.64%)	16376938(15.14%)	19387412(17.83%)	13891813(12.40%)	20154713(18.39%)	22216484(20.27%)	14107534(12.94%)	18836375(17.29%)	21148854(19.41%)	18463362(17.07%)	21588307(19.77%)	16756317(15.25%)	20811882(19.10%)	16387447(14.74%)	14815053(13.38%)	20818085(19.08%)
Uniquely mapped	89888481(80.57%)	82945953(76.24%)	75748477(70.05%)	87881371(81.16%)	83517751(74.40%)	75545024(69.80%)	89230351(80.61%)	84286659(75.75%)	73734169(68.96%)	87297547(80.05%)	85297010(76.57%)	80454600(72.38%)	87443259(79.33%)	84219186(76.86%)	77464949(71.90%)	89879085(80.21%)	82796767(75.64%)	77352402(71.84%)	85992189(77.94%)	80472262(73.44%)	77753860(71.68%)	87179588(78.52%)	82448804(74.31%)	79606357(72.30%)	88288628(78.53%)	81717697(74.47%)	80326999(71.74%)	86306480(78.87%)	79234670(73.21%)	81197094(73.28%)	87857979(80.14%)	81298088(74.35%)	79539370(71.92%)	87034615(78.71%)	83052958(76.80%)	78892844(72.54%)	88445146(78.93%)	78781197(71.90%)	79507168(72.53%)	85733804(78.65%)	79655961(73.13%)	79212596(72.71%)	79311340(73.33%)	79417347(72.71%)	82375588(74.97%)	76752769(70.46%)	86481743(77.76%)	85945226(77.63%)	77954813(71.44%)
Read-1	45275079(40.58%)	42065859(38.67%)	38697342(35.79%)	44289457(40.90%)	42129331(37.53%)	38664949(35.73%)	44924659(40.59%)	42620871(38.30%)	37670627(35.23%)	43940406(40.29%)	43232899(38.81%)	41017998(36.90%)	44025392(39.94%)	42565532(38.85%)	39530447(36.69%)	45255165(40.39%)	41907862(38.29%)	39412827(36.61%)	43494617(39.42%)	40692473(37.14%)	39164063(36.11%)	44107417(39.73%)	41547001(37.45%)	40150192(36.47%)	44653303(39.72%)	41268447(37.61%)	40480392(36.15%)	43484342(39.74%)	40179951(37.12%)	41449675(37.41%)	44138671(40.26%)	41300138(37.77%)	40475903(36.60%)	43802304(39.61%)	42179409(39.00%)	40242615(37.00%)	44788198(39.97%)	40123142(36.62%)	40088339(36.57%)	43315061(39.74%)	40660163(37.33%)	39853579(36.58%)	40311503(37.27%)	40011000(36.63%)	41672616(37.93%)	39184770(35.97%)	43429506(39.05%)	43516117(39.31%)	39661632(36.35%)
Read-2	44613402(39.99%)	40880094(37.58%)	37051135(34.26%)	43591914(40.26%)	41388420(36.87%)	36880075(34.08%)	44305692(40.03%)	41665788(37.44%)	36063542(33.73%)	43357141(39.76%)	42064111(37.76%)	39436602(35.48%)	43417867(39.39%)	41653654(38.01%)	37934502(35.21%)	44623920(39.82%)	40888905(37.36%)	37939575(35.24%)	42497572(38.52%)	39779789(36.30%)	38589797(35.58%)	43072171(38.80%)	40901803(36.86%)	39456165(35.84%)	43635325(38.81%)	40449250(36.86%)	39846607(35.59%)	42822138(39.13%)	39054719(36.08%)	39747419(35.87%)	43719308(39.88%)	39997950(36.58%)	39063467(35.32%)	43232311(39.10%)	40873549(37.79%)	38650229(35.54%)	43656948(38.96%)	38658055(35.28%)	39418829(35.96%)	42418743(38.92%)	38995798(35.80%)	39359017(36.13%)	38999837(36.06%)	39406347(36.08%)	40702972(37.04%)	37567999(34.49%)	43052237(38.71%)	42429109(38.33%)	38293181(35.09%)
Reads map to '+'	44927970(40.27%)	41423225(38.08%)	37851455(35.00%)	43918929(40.56%)	41732387(37.17%)	37747582(34.88%)	44595411(40.29%)	42111080(37.84%)	36837967(34.45%)	43644341(40.02%)	42621369(38.26%)	40221564(36.19%)	43718067(39.66%)	42080985(38.40%)	38721393(35.94%)	44924671(40.09%)	41367885(37.79%)	38666637(35.91%)	43003690(38.98%)	40261306(36.74%)	38899687(35.86%)	43601168(39.27%)	41245490(37.17%)	39819335(36.17%)	44123525(39.25%)	40859047(37.23%)	40173657(35.88%)	43147210(39.43%)	39621895(36.61%)	40600206(36.64%)	43930402(40.07%)	40641504(37.17%)	39773911(35.97%)	43512474(39.35%)	41496603(38.37%)	39433387(36.26%)	44235906(39.48%)	39415616(35.97%)	39781982(36.29%)	42876201(39.33%)	39847478(36.58%)	39628626(36.38%)	39651149(36.66%)	39716550(36.36%)	41187843(37.48%)	38394805(35.24%)	43259741(38.90%)	42981583(38.82%)	38989984(35.73%)
Reads map to '-'	44960511(40.30%)	41522728(38.17%)	37897022(35.05%)	43962442(40.60%)	41785364(37.22%)	37797442(34.92%)	44634940(40.32%)	42175579(37.90%)	36896202(34.51%)	43653206(40.03%)	42675641(38.31%)	40233036(36.20%)	43725192(39.67%)	42138201(38.46%)	38743556(35.96%)	44954414(40.12%)	41428882(37.85%)	38685765(35.93%)	42988499(38.96%)	40210956(36.70%)	38854173(35.82%)	43578420(39.25%)	41203314(37.14%)	39787022(36.14%)	44165103(39.28%)	40858650(37.23%)	40153342(35.86%)	43159270(39.44%)	39612775(36.60%)	40596888(36.64%)	43927577(40.07%)	40656584(37.18%)	39765459(35.96%)	43522141(39.36%)	41556355(38.43%)	39459457(36.28%)	44209240(39.45%)	39365581(35.93%)	39725186(36.24%)	42857603(39.32%)	39808483(36.55%)	39583970(36.34%)	39660191(36.67%)	39700797(36.35%)	41187745(37.48%)	38357964(35.21%)	43222002(38.87%)	42963643(38.81%)	38964829(35.71%)
Non-splice reads	68471575(61.37%)	62188865(57.16%)	55554899(51.38%)	66702987(61.60%)	63300096(56.39%)	57283629(52.93%)	67388467(60.88%)	62497508(56.16%)	53337292(49.88%)	66359989(60.85%)	64298974(57.72%)	57967755(52.15%)	67245737(61.00%)	62428537(56.97%)	55772633(51.76%)	67228451(59.99%)	60747279(55.50%)	57242498(53.17%)	64985643(58.90%)	59978523(54.74%)	56154908(51.77%)	66267858(59.69%)	61061236(55.03%)	59082082(53.66%)	66352052(59.02%)	61284204(55.85%)	57658344(51.49%)	64466278(58.91%)	56596859(52.29%)	60261089(54.38%)	66695138(60.83%)	59799552(54.69%)	57447865(51.95%)	65408035(59.16%)	62221167(57.53%)	58257274(53.57%)	68367010(61.01%)	56922387(51.95%)	56603735(51.64%)	65364115(59.97%)	58346776(53.56%)	56959533(52.28%)	58131032(53.75%)	56869386(52.07%)	60977082(55.49%)	56926550(52.26%)	64043222(57.59%)	66131414(59.73%)	57180554(52.40%)
Splice reads	21416906(19.20%)	20757088(19.08%)	20193578(18.67%)	21178384(19.56%)	20217655(18.01%)	18261395(16.87%)	21841884(19.73%)	21789151(19.58%)	20396877(19.08%)	20937558(19.20%)	20998036(18.85%)	22486845(20.23%)	20197522(18.32%)	21790649(19.89%)	21692316(20.13%)	22650634(20.21%)	22049488(20.14%)	20109904(18.68%)	21006546(19.04%)	20493739(18.70%)	21598952(19.91%)	20911730(18.84%)	21387568(19.28%)	20524275(18.64%)	21936576(19.51%)	20433493(18.62%)	22668655(20.25%)	21840202(19.96%)	22637811(20.92%)	20936005(18.89%)	21162841(19.30%)	21498536(19.66%)	22091505(19.98%)	21626580(19.56%)	20831791(19.26%)	20635570(18.97%)	20078136(17.92%)	21858810(19.95%)	22903433(20.89%)	20369689(18.69%)	21309185(19.56%)	22253063(20.43%)	21180308(19.58%)	22547961(20.64%)	21398506(19.47%)	19826219(18.20%)	22438521(20.18%)	19813812(17.90%)	20774259(19.04%)
Reads mapped in proper pairs	72871642(65.32%)	74006482(68.03%)	61937646(57.28%)	69355578(64.05%)	78035048(69.51%)	60720256(56.10%)	71239684(64.36%)	77842696(69.95%)	57743330(54.00%)	71569184(65.63%)	78353234(70.34%)	66297292(59.64%)	70585722(64.03%)	75996580(69.36%)	65510552(60.80%)	71742538(64.02%)	75345546(68.84%)	64350648(59.77%)	75333898(68.28%)	66371388(60.57%)	66231308(61.06%)	76358218(68.78%)	66727668(60.14%)	65422936(59.42%)	76935174(68.43%)	65792534(59.96%)	64869298(57.94%)	69565138(63.57%)	69917258(64.60%)	66456070(59.97%)	73052360(66.63%)	70673764(64.63%)	66012638(59.69%)	70203876(63.49%)	69235656(64.02%)	64490962(59.30%)	76339080(68.13%)	64396248(58.77%)	69795044(63.67%)	74985688(68.79%)	63659188(58.44%)	67710352(62.15%)	67446230(62.36%)	68711918(62.91%)	72987832(66.42%)	61454608(56.41%)	73234896(65.85%)	76544266(69.14%)	62553392(57.33%)
[truncated: 50 more columns]
